# Supplementary material for: Fusobacterium nucleatum promotes chemoresistance to 5-fluorouracil by upregulation of BIRC3 expression in colorectal cancer
Source: PubMed Central journal article supplement (PMC6327560; doi:10.1186/s13046-018-0985-y), 2019-01-10
Supplement: 13046_2018_985_MOESM3_ESM.pdf [file 13046_2018_985_MOESM3_ESM.pdf]

GGAAATCCCC

0 350 360 370  
CTTTTGGGTTCATGGAAATCCCCGAGTGGGTTTGCCAG

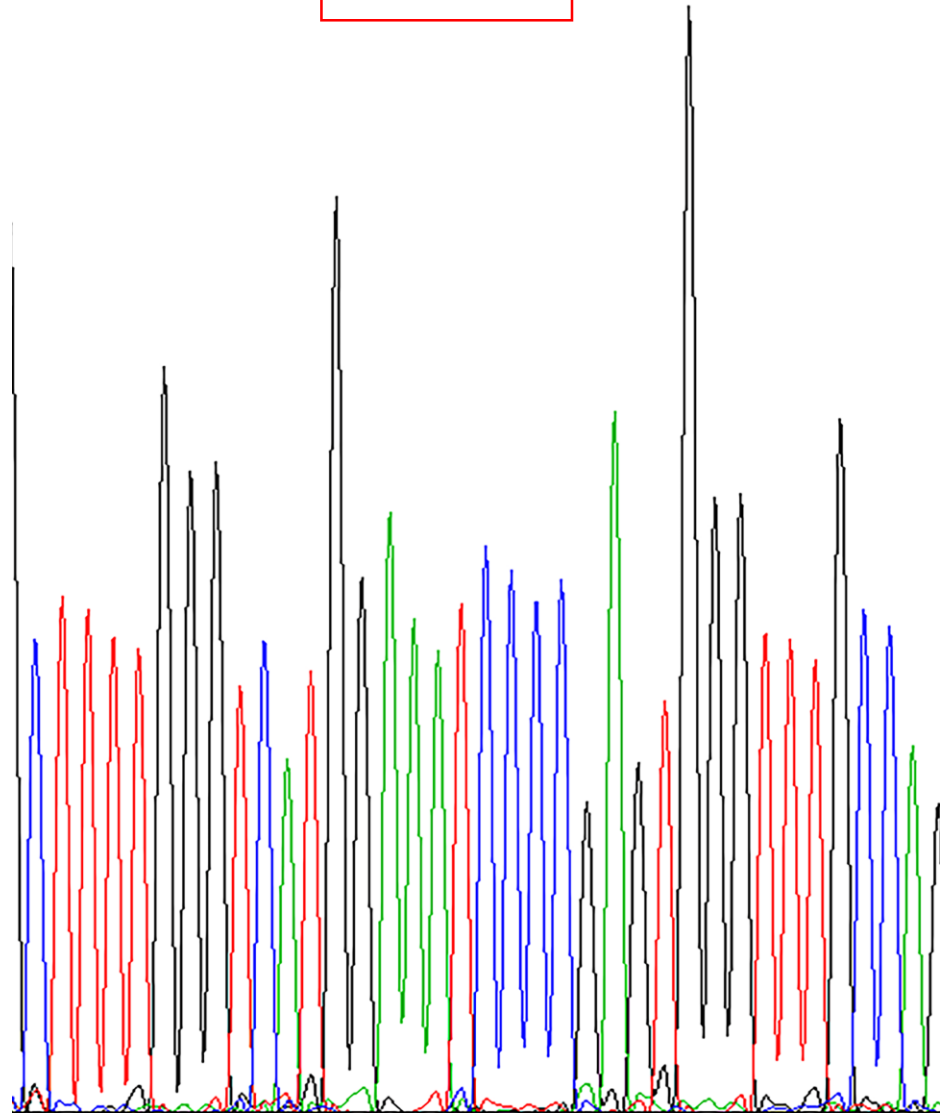

Wild type 1

AAACTCCGAA

0 650 660 670  
CTTTTGGGTTCATAAACTCCGAAAGAGTGGGTTTGCC

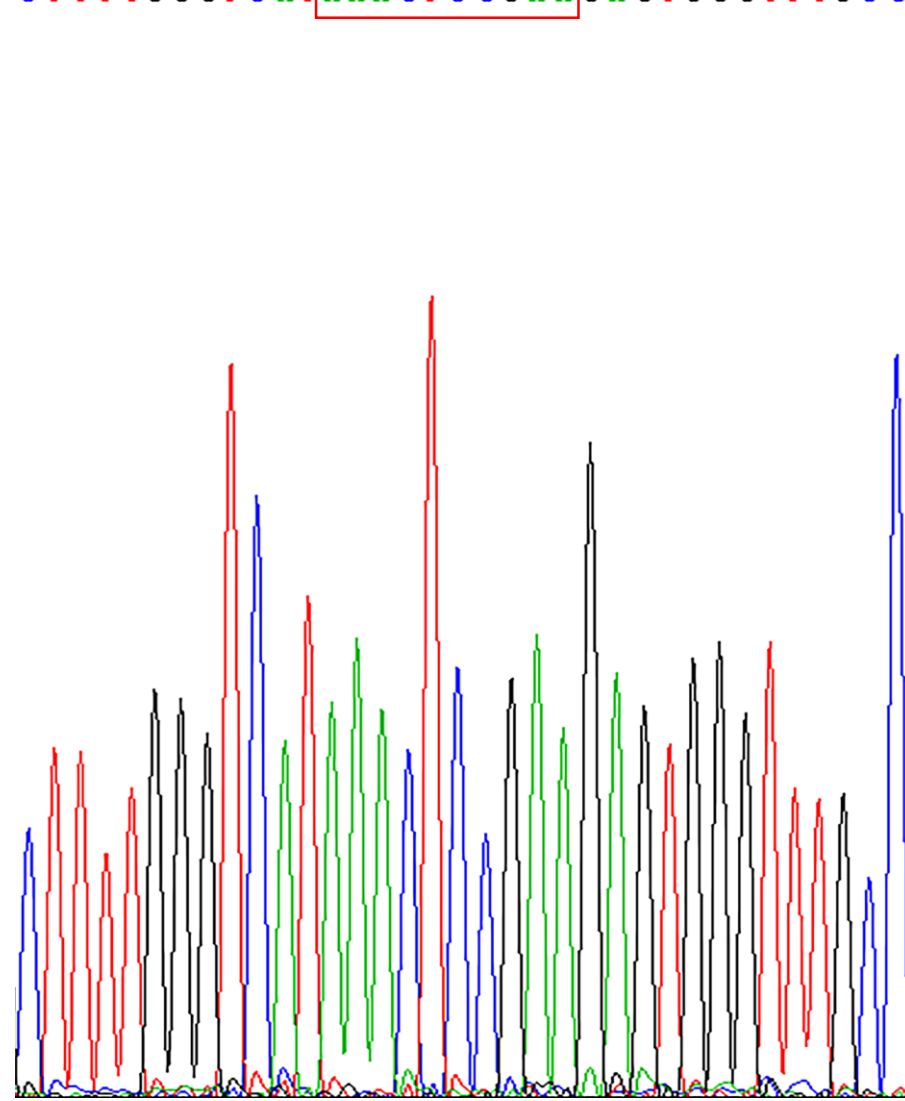

Mutant 1

TGGAGTTCCC

410 420 430  
TTATTACCGCTGGAGTTCCCCTAAGTCCTAAA

AAACTCCGAA

590 600 610 620  
GTTATTACCGCAAACTCCGAACCTAAGTCCTAAA

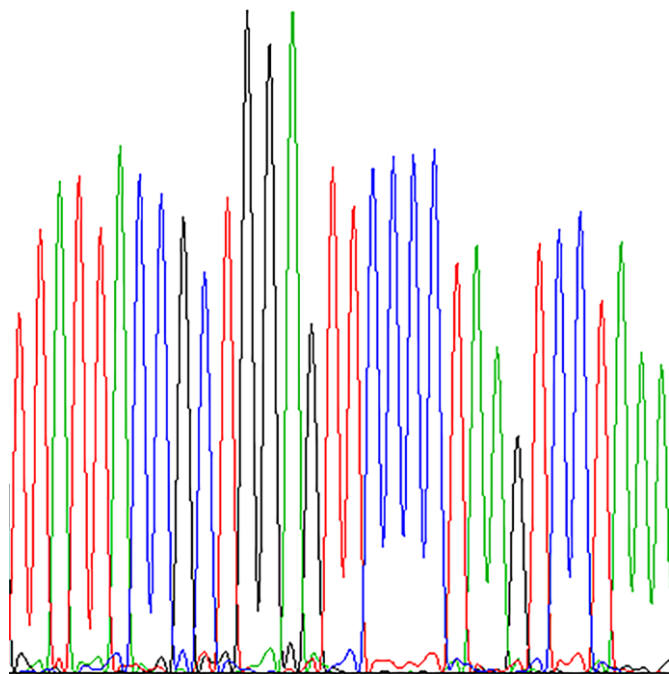

Wild type 2

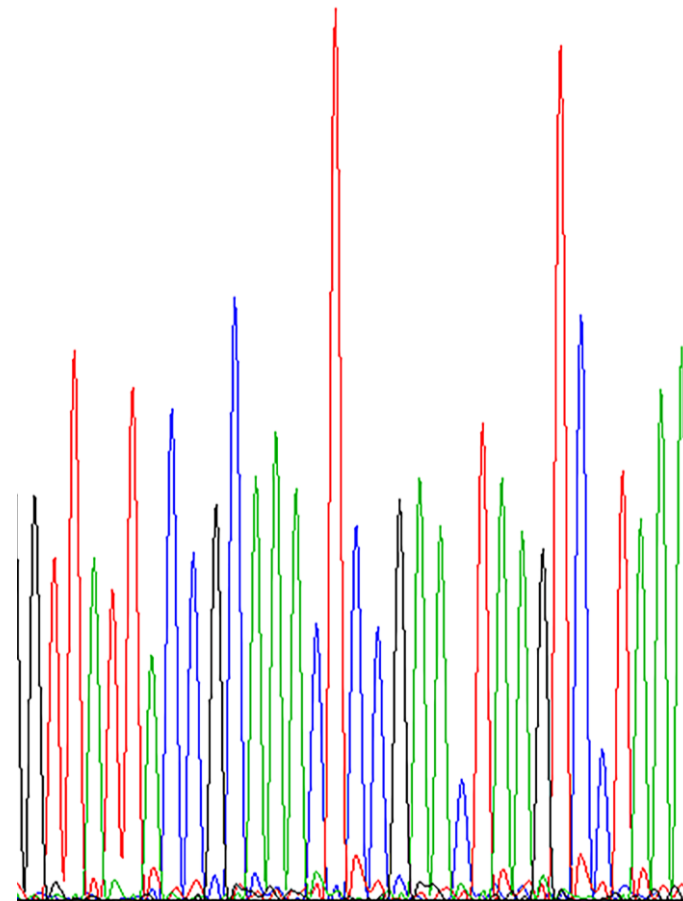

Mutant 2
